# Supplementary material for: Stability of the local electronic properties of La3Ni2O7 under pressure
Source: Research Square preprint supplement (doi:10.21203/rs.3.rs-7347905/v1), 2025-09-01
Supplement: Supplementary file 1 [file ef198807455a358475802a7d.pdf]

# Supplementary Information

## Stability of the local electronic properties of $\text{La}_3\text{Ni}_2\text{O}_7$ under pressure

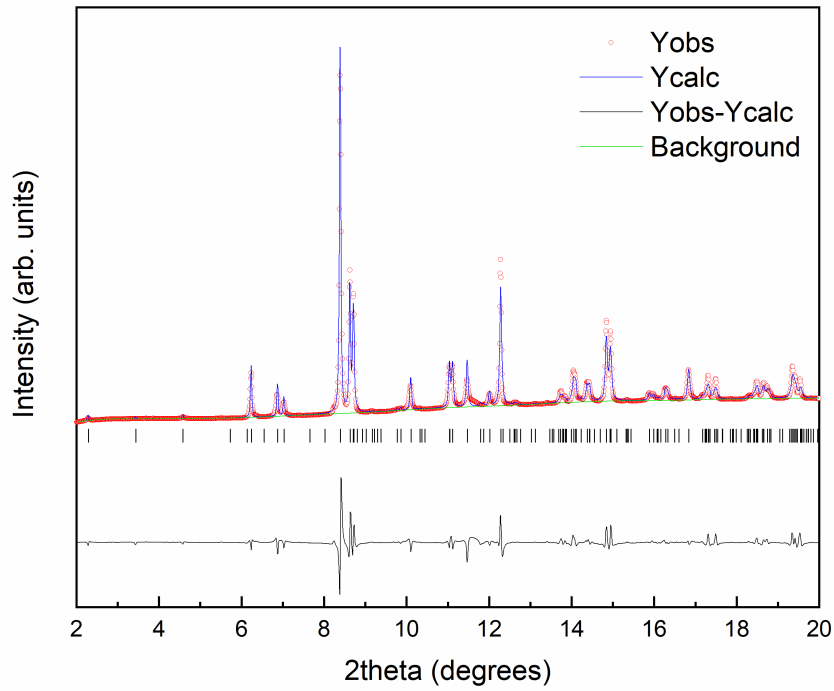

Figure S1: Powder X-ray diffraction measurements at ambient conditions confirm that the sample is phase-pure  $\text{La}_3\text{Ni}_2\text{O}_7$ . The diffraction pattern was fitted using the ambient pressure orthorhombic structure with the Cmmm space group. The refined lattice parameters ( $a = 5.38902 \text{ \AA}$ ,  $b = 5.44791 \text{ \AA}$ ,  $c = 20.50644 \text{ \AA}$ ) are in good agreement with previously reported literature values. Diffraction pattern was collected at ID15b beamline of ESRF with x-ray photon energy at 30 keV ( $\lambda \sim 0.41 \text{ \AA}$ ).

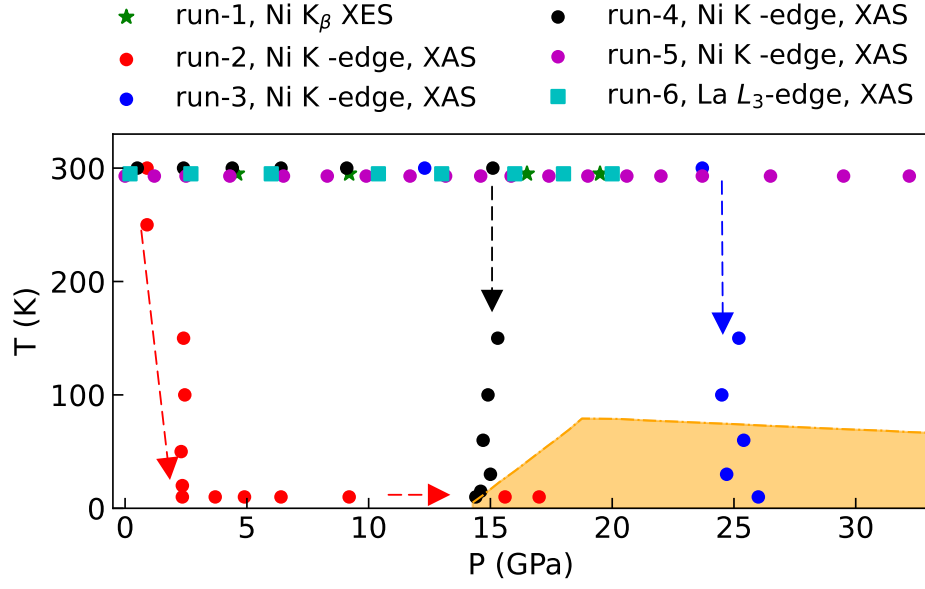

Figure S2: Experimental conditions and routes mapped onto the phase diagram of  $\text{La}_3\text{Ni}_2\text{O}_7$  reported by H. Sun et al (Nature 621, 493, 2023).

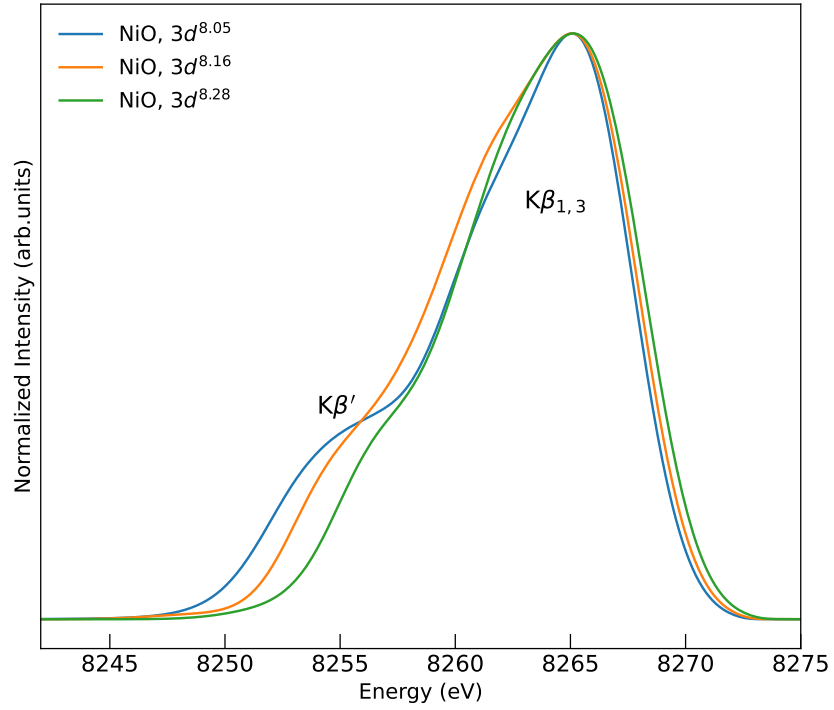

Figure S3: Simulation of Ni  $K\beta$  XES for different 3d filling.

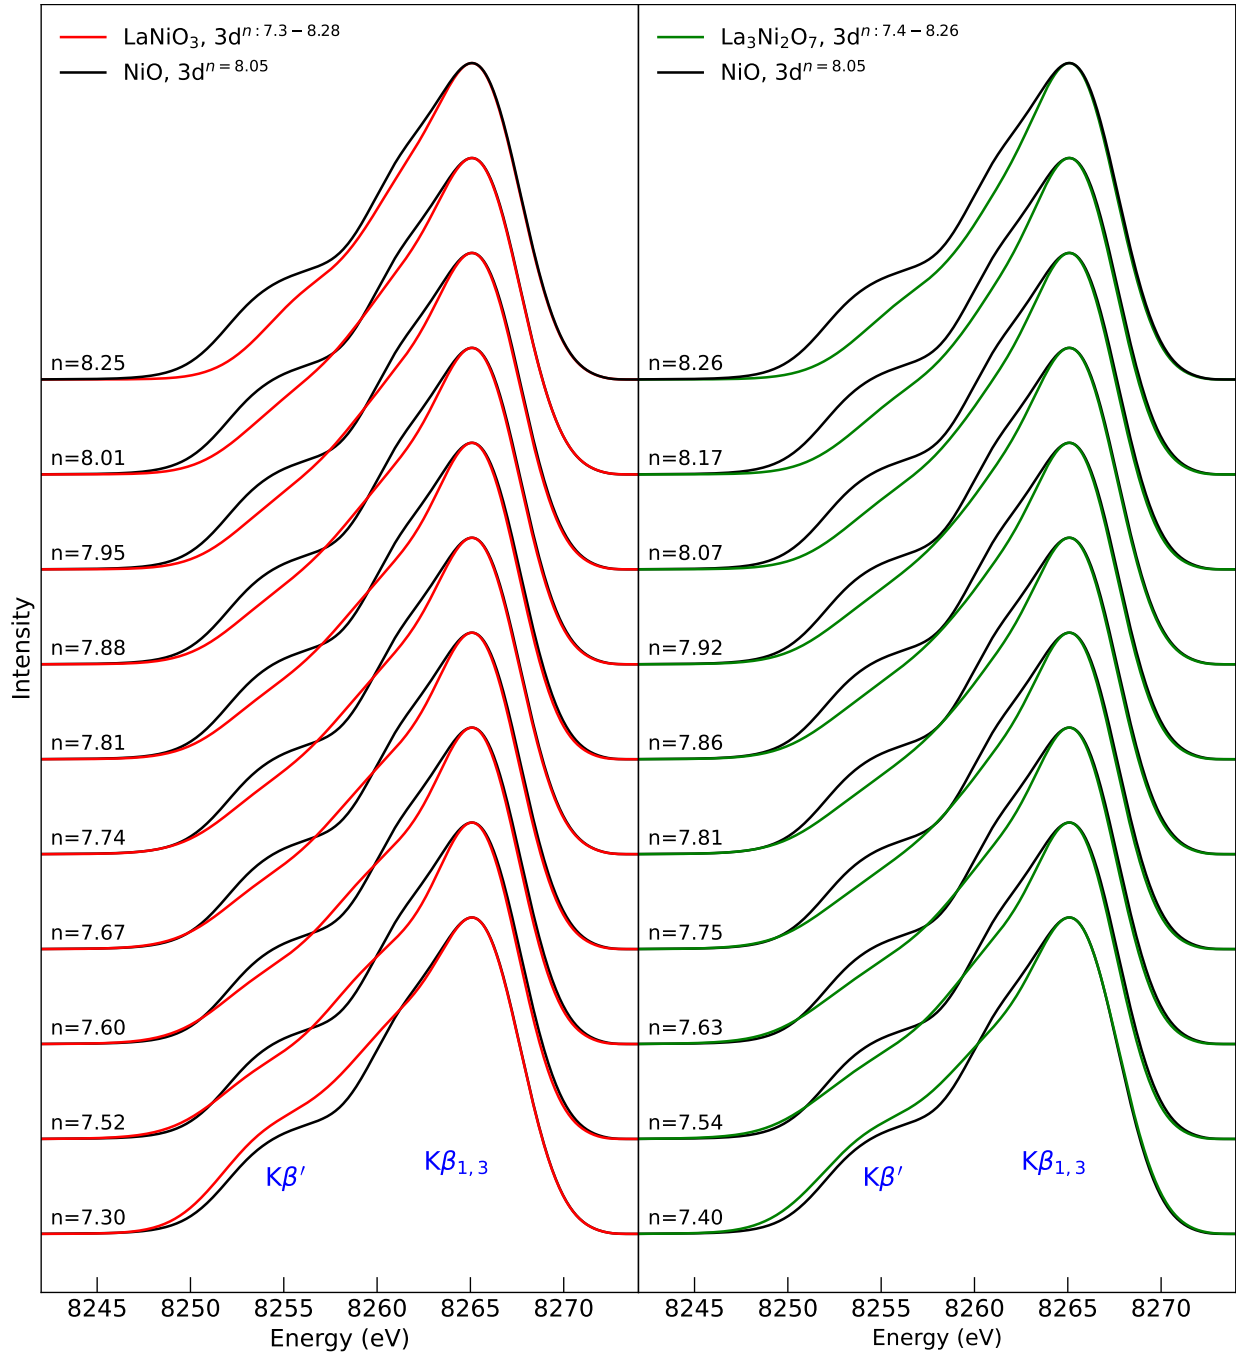

Figure S4: Simulated Ni  $K\beta$  XES spectra of LaNiO<sub>3</sub> (a) and La<sub>3</sub>Ni<sub>2</sub>O<sub>7</sub> (b) with various 3d occupancies, compared with the spectrum of NiO calculated for a  $3d^{8.05}$  configuration.

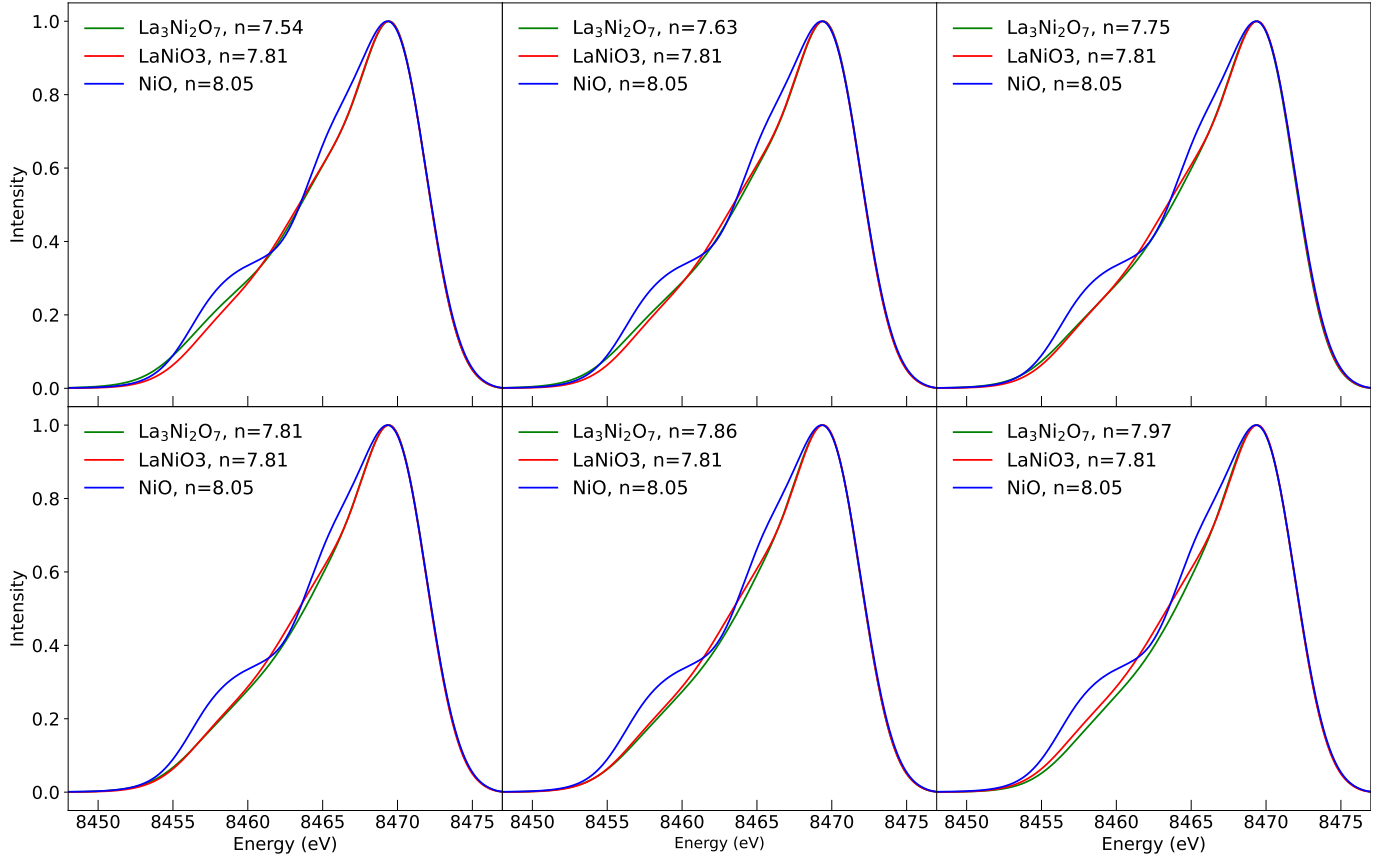

Figure S5: Simulated Ni  $K\beta$  XES spectra of  $\text{La}_3\text{Ni}_2\text{O}_7$  with various 3d occupancies, compared with those of  $\text{NiO}$  and  $\text{LaNiO}_3$ , calculated for  $3d^{8.05}$  and  $3d^{7.81}$  configurations, respectively.

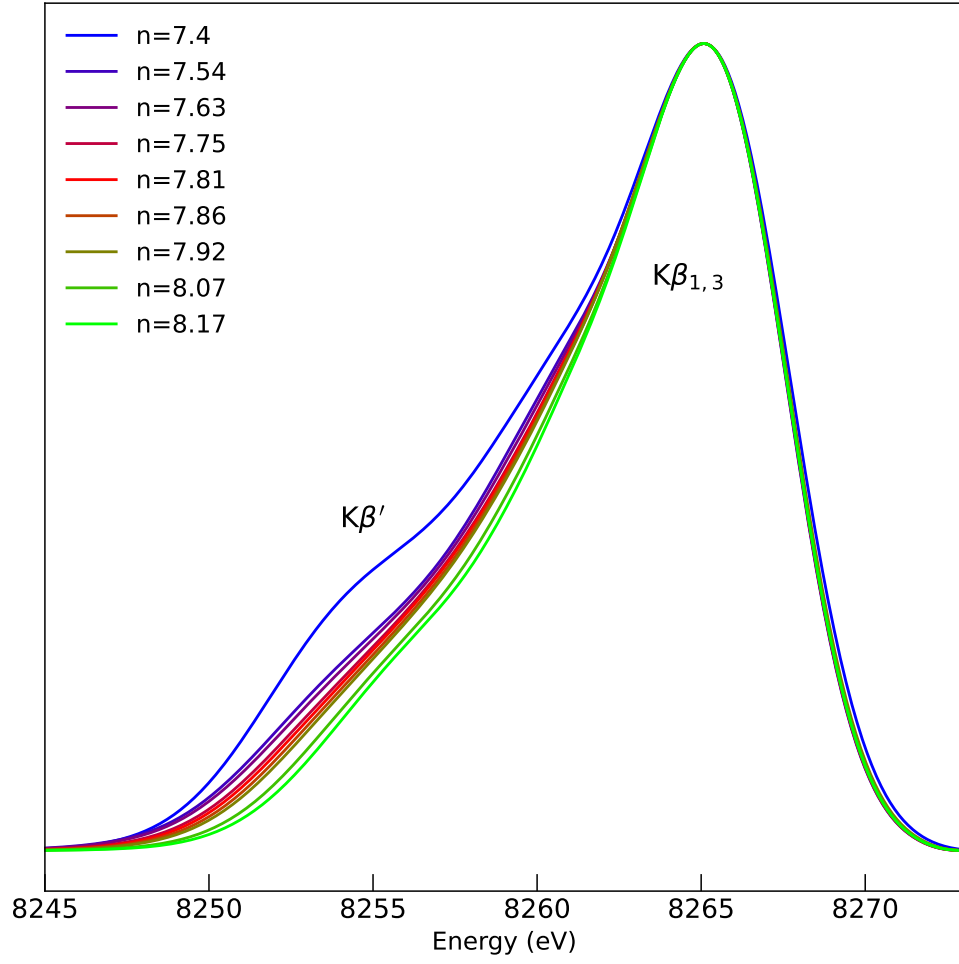

Figure S6: Simulated Ni  $K\beta$  XES spectra of  $\text{La}_3\text{Ni}_2\text{O}_7$  with various 3d occupancies, plotted on the same scale (without y-offset) for better comparison.

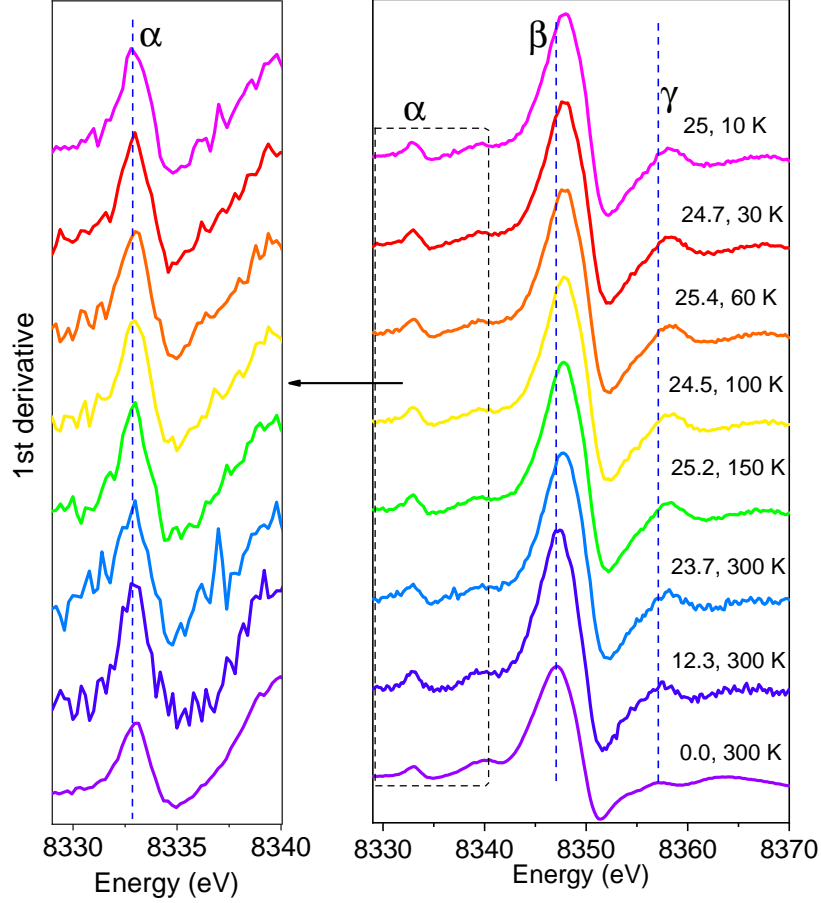

Figure S7: First derivative of the Ni  $K$ -edge XANES measured along the 2nd experimental run (run-2). Pre-edge range was shown with magnification at the left panel. Stable energy position and nearly similar line shapes of pre-edge peak **A** can be seen from the behavior of feature  $\alpha$  in the first derivative spectra (left panel). Shift of the edge energy is evident from the movement of the main peak (feature  $\beta$ ), while the enhancement of feature **C** is captured by the appearance of feature  $\gamma$  in the first derivative spectra (right panel). The absence of spectral modifications upon cooling at 23.7 ~ 25 GPa (see Fig. 4d in the main text) is further confirmed by the identical line shapes of the first derivative spectra.

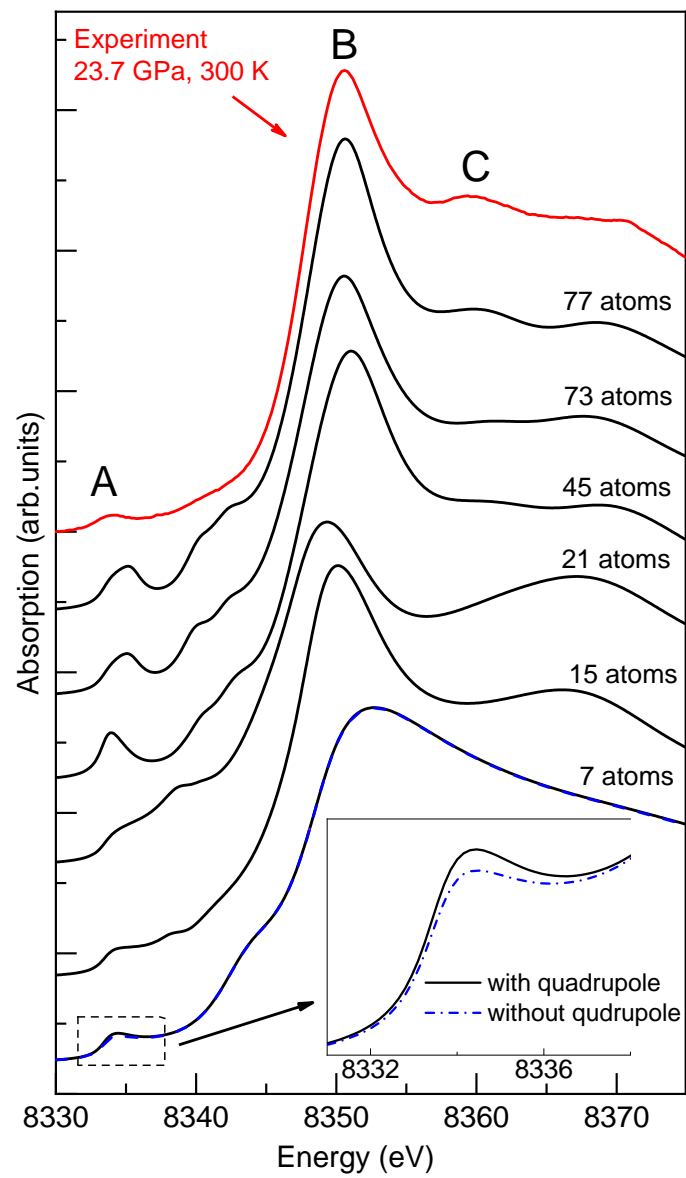

Figure S8: XANES simulations performed for various atomic cluster sizes. Experimental spectra (red curve) was measured at  $P=23.7$  GPa under room temperature.

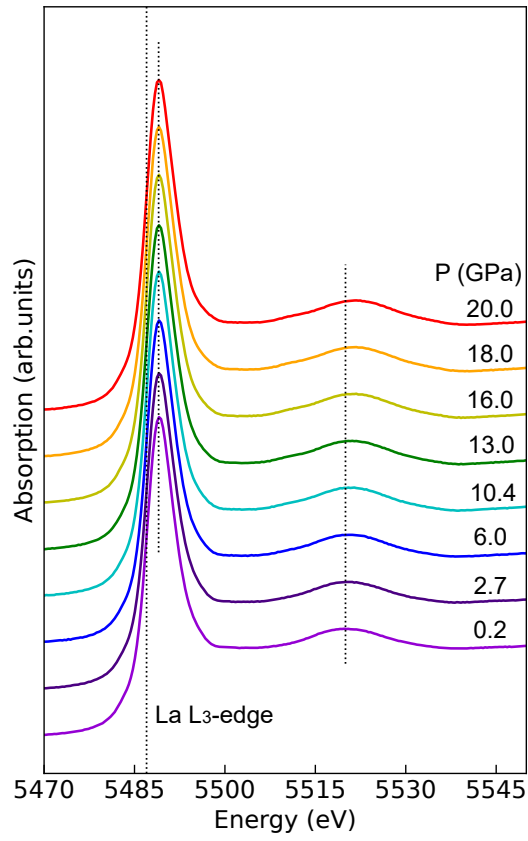

Figure S9: La  $L_3$ -edge XANES of  $\text{La}_3\text{Ni}_2\text{O}_7$  measured along run-5 up to 20 GPa under room temperature.
